# Supplementary material for: Association mapping reveals novel serpentine adaptation gene clusters in a population of symbiotic Mesorhizobium
Source: PubMed Central journal article supplement (PMC5315480; doi:10.1038/ismej.2016.88), 2016-07-15

**a**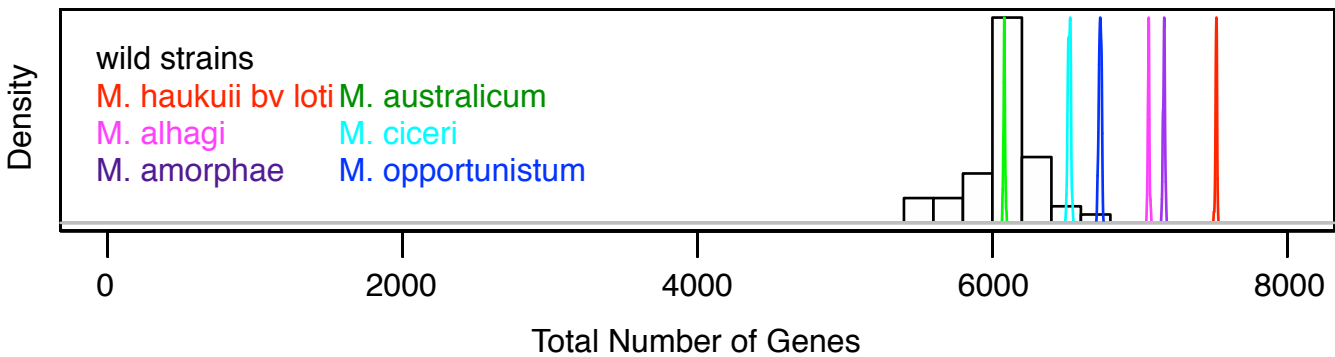**b**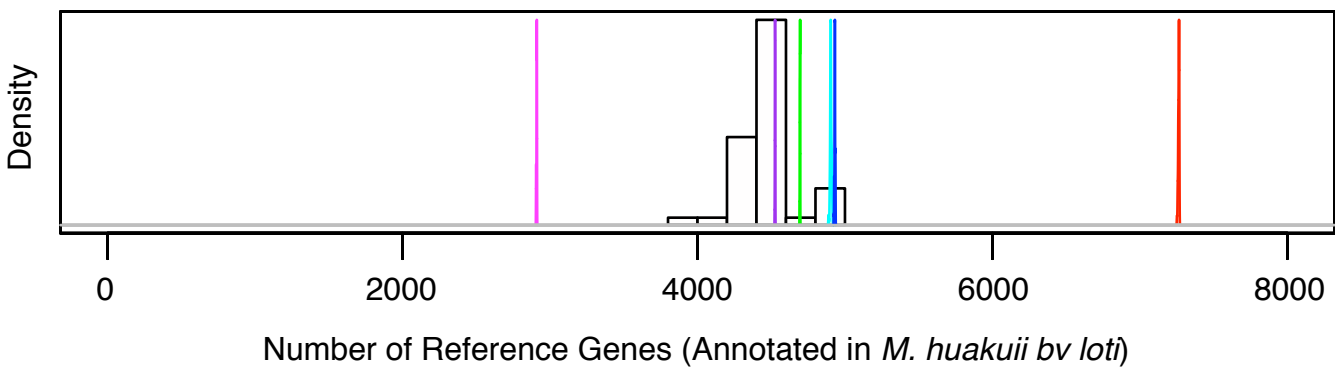**c**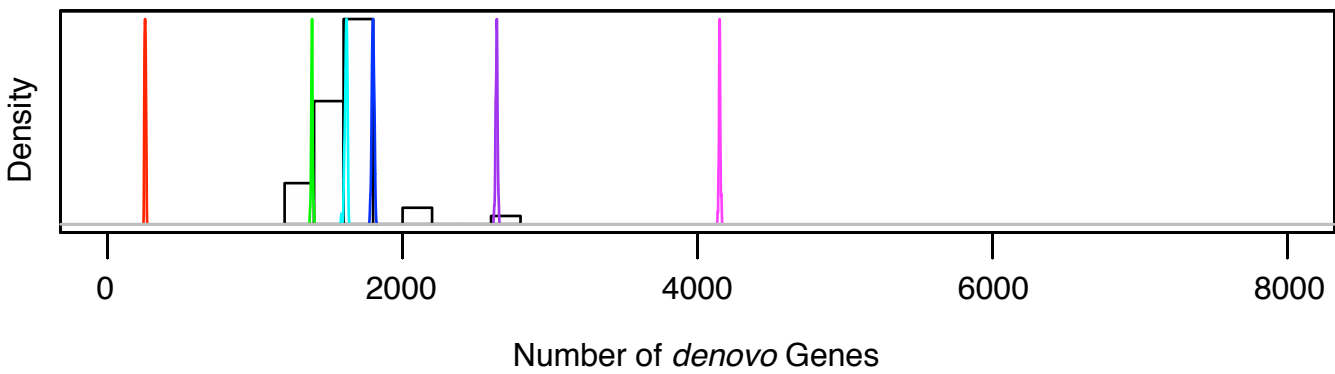

Supplement: ismej201688x2.pdf [file ismej201688x2.pdf]
