# Supplementary material for: Association mapping reveals novel serpentine adaptation gene clusters in a population of symbiotic Mesorhizobium
Source: PubMed Central journal article supplement (PMC5315480; doi:10.1038/ismej.2016.88), 2016-07-15
Supplement: ismej201688x4.pdf [file ismej201688x4.pdf]

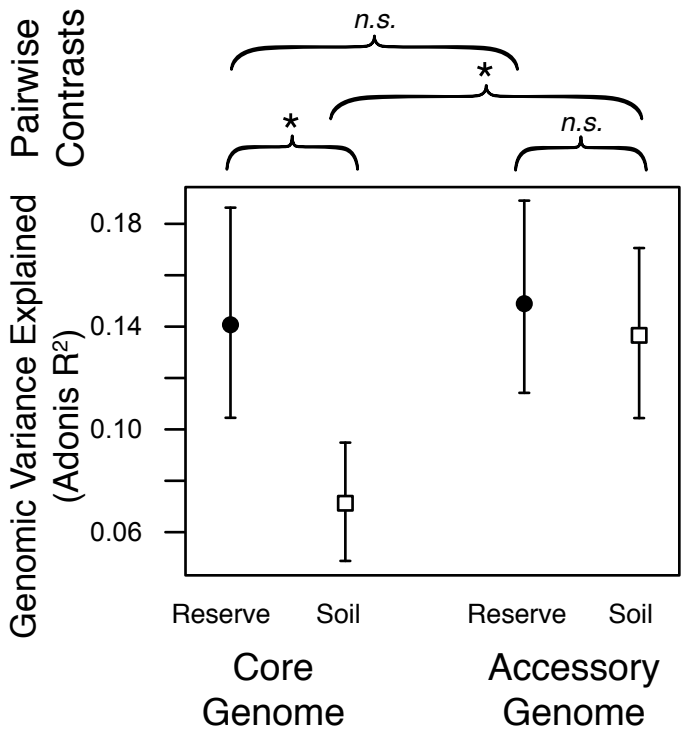

**FIGURE S3**
